# Supplementary material
Source: Royal Society of Chemistry journal article supplement (doi:10.1039/d6ay00005c)
Supplement: d6ay00005c1.pdf [file d6ay00005c1.pdf]

| No. | Structure                                                                           | CAS number | No. | Structure                                                                            | CAS number | No. | Structure                                                                             | CAS number  |
|-----|-------------------------------------------------------------------------------------|------------|-----|--------------------------------------------------------------------------------------|------------|-----|---------------------------------------------------------------------------------------|-------------|
| 1   |    | 15980-15-1 | 10  |    | 20333-39-5 | 19  |    | 118023-96-4 |
| 2   |    | 693-07-2   | 11  |    | 40697-99-2 | 20  |    | 2625-76-5   |
| 3   |    | 5616-51-3  | 12  |    | 81142-02-1 | 21  |    | 13678-58-5  |
| 4   |    | 505-29-3   | 13  |    | 110-81-6   | 22  |    | 81451-19-6  |
| 5   |    | 6669-39-2  | 14  |    | 4413-12-1  | 23  |    | 1002-41-1   |
| 6   |    | 88017-34-9 | 15  |    | 3658-80-8  | 24  |    | 63918-89-8  |
| 7   |  | 505-60-2   | 16  |   | 49563-09-9 | 25  |  | 63869-13-6  |
| 8   |  | 19698-38-5 | 17  |  | 42474-44-2 | 26  |  | 117239-10-8 |

**Table S1** All CAS ultimately screened as valuable for attribution

9

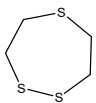

6576-93-8 18

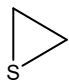

420-12-2 27

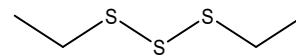

3600-24-6

---

**Table S1 (Continued)** All CAS ultimately screened as valuable for attribution

| No. | Structure                                                                           | CAS number | No. | Structure                                                                             | CAS number  | No. | Structure                                                                            | CAS number |
|-----|-------------------------------------------------------------------------------------|------------|-----|---------------------------------------------------------------------------------------|-------------|-----|--------------------------------------------------------------------------------------|------------|
| 28  | 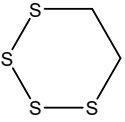   | 290-81-3   | 37  |    | 25423-56-7  | 46  |   | 557-22-2   |
| 29  |    | 7579-29-7  | 38  |     | 623-98-3    | 47  |   | 1498-42-6  |
| 30  |    | 19149-77-0 | 39  |     | 627-51-0    | 48  |   | 1498-51-7  |
| 31  |    | 51472-73-2 | 40  |    | 1120-59-8   | 49  |   | 814-49-3   |
| 32  |    | 693-07-2   | 41  |    | 5418-86-0   | 50  |   | 2757-23-5  |
| 33  |    | 1940-01-8  | 42  |    | 822-39-9    | 51  |   | 110-01-0   |
| 34  |   | 627-50-9   | 43  |   | 31038-06-9  | 52  |  | 10025-67-9 |
| 35  |  | 2373-51-5  | 44  |  | 13798-23-7  |     |                                                                                      |            |
| 36  |  | 7617-64-3  | 45  |  | 116664-29-0 |     |                                                                                      |            |

**Table S2- S9** Delineate the predictive results of the various classification models for the test set. Each model assesses the matching degree between a test sample and individual synthetic routes and assigns a corresponding similarity score; the route with the highest score is defined as the attributed route for the sample, corresponding to the highest inferred similarity. Green denotes correct classifications and red denotes incorrect ones.

**Table S2** M1 Predictions

| Test sample \ Predict | Predict           |                  |                  |
|-----------------------|-------------------|------------------|------------------|
|                       | SOCl <sub>2</sub> | PCl <sub>3</sub> | No intermediates |
| A                     | -0.009817         | 0.979193         | 0.0306233        |
| B                     | 1.01414           | 0.019638         | -0.0337799       |
| C                     | -0.28476          | 1.31222          | -0.027463        |
| D                     | 1.02844           | 0.094258         | -0.122698        |
| E                     | -0.053148         | 0.92644          | 0.126708         |
| F                     | 0.616178          | 0.378016         | 0.00580586       |
| G                     | 0.218256          | 0.78025          | 0.00149384       |
| H                     | 1.43198           | -0.38365         | -0.0483359       |
| I                     | -3.07257          | 4.53973          | -0.467153        |
| J                     | 1.07471           | -0.15085         | 0.0761442        |
| K                     | -0.105073         | 1.12263          | -0.0175594       |
| L                     | 1.04472           | -0.05508         | 0.0103634        |
| M                     | 0.0846811         | 0.904707         | 0.010612         |
| N                     | 0.927266          | 0.015132         | 0.0576023        |
| O                     | 0.277807          | 0.753088         | -0.0308955       |
| P                     | 0.548637          | 0.478067         | -0.0267036       |
| Q                     | 0.397719          | 0.614909         | -0.0126279       |
| R                     | 0.521532          | 0.447458         | 0.0310101        |
| S                     | 0.409603          | 0.585707         | 0.00469029       |
| T                     | 2.18828           | -1.32636         | 0.138079         |
| U                     | -0.35923          | 0.125645         | 1.23359          |
| V                     | 0.0804285         | -0.07169         | 0.991259         |

**Table S3** M2 Predictions

| Test sample \ Predict | Predict  |          |
|-----------------------|----------|----------|
|                       | Stepwise | One-pot  |
| B                     | 1.24089  | -0.24089 |
| D                     | -0.38822 | 1.38822  |
| J                     | 1.16539  | -0.16539 |
| L                     | 0.184094 | 0.815906 |
| F                     | 0.69928  | 0.30072  |
| H                     | 0.157212 | 0.842788 |
| N                     | 1.23488  | -0.23488 |
| P                     | 0.106581 | 0.893419 |
| R                     | 0.10186  | 0.89814  |
| T                     | -0.62002 | 1.62002  |

**Table S4** M3 Predictions

| Test sample \ Predict | Predict  |          |
|-----------------------|----------|----------|
|                       | Stepwise | One-pot  |
| A                     | 1.06421  | -0.06421 |
| C                     | -0.11245 | 1.11245  |
| I                     | 1.51952  | -0.51952 |
| K                     | -0.04071 | 1.04071  |
| E                     | 0.970514 | 0.029486 |
| G                     | 0.306599 | 0.693401 |
| M                     | 0.80604  | 0.19396  |
| O                     | 0.014203 | 0.985797 |
| Q                     | 0.009398 | 0.990602 |
| S                     | 0.186363 | 0.813637 |

**Table S5** M4 Predictions

| Test sample \ Predict | Predict  |          |          |          |          |          |
|-----------------------|----------|----------|----------|----------|----------|----------|
|                       | (D)      | (H)      | (L)      | (P)      | (R)      | (T)      |
| D                     | 1.7081   | -0.04313 | -0.06723 | -0.16224 | -0.30561 | -0.12988 |
| H                     | -0.34454 | 2.31296  | -0.25035 | -0.07142 | -0.40252 | -0.24413 |
| L                     | -0.00075 | 0.008024 | 0.969172 | -0.01261 | 0.018483 | 0.017685 |
| P                     | -0.07978 | -0.06221 | -0.06127 | 1.39283  | -0.10349 | -0.08608 |
| R                     | 0.198374 | 0.049757 | 0.065522 | 0.207498 | 0.400812 | 0.078036 |
| T                     | -0.33251 | -0.16316 | -0.16153 | -0.28815 | -1.24281 | 3.18815  |

**Table S6** Extended Data Table 6 M5 Predictions

| Test sample \ Predict | Predict  |          |          |          |
|-----------------------|----------|----------|----------|----------|
|                       | (B)      | (F)      | (N)      | (J)      |
| B                     | 1.17001  | -0.08998 | -0.03589 | -0.04414 |
| F                     | 0.024678 | 0.855713 | 0.045842 | 0.073767 |
| N                     | -0.03109 | -0.04452 | 0.963371 | 0.112236 |
| J                     | 0.00447  | -0.17726 | -0.09397 | 1.26676  |

**Table S7** M6 Predictions

| Test sample \ Predict | Predict  |          |          |          |
|-----------------------|----------|----------|----------|----------|
|                       | (A)      | (E)      | (I)      | (M)      |
| A                     | 1.06587  | -0.03536 | -0.03372 | 0.003209 |
| E                     | 0.069486 | 1.21211  | -0.35404 | 0.072448 |
| I                     | -0.85238 | 0.626813 | 1.27868  | -0.05311 |
| M                     | -0.0064  | 0.046581 | 0.237111 | 0.72271  |

**Table S8** M7 Predictions

| <b>Predict</b><br><b>Test sample</b> | <b>(C)</b> | <b>(G)</b> | <b>(K)</b> | <b>(O)</b> | <b>(Q)</b> | <b>(S)</b> |
|--------------------------------------|------------|------------|------------|------------|------------|------------|
| <b>C</b>                             | 1.53906    | 0.101548   | -0.10691   | -0.09792   | 0.008813   | -0.4446    |
| <b>G</b>                             | -0.08806   | 1.05638    | -0.04565   | -0.1793    | 0.010976   | 0.245654   |
| <b>K</b>                             | 0.087572   | -0.09427   | 1.04185    | -0.07444   | 0.012629   | 0.026658   |
| <b>O</b>                             | 0.012739   | -0.00132   | 0.049822   | 0.8692     | -0.00474   | 0.074299   |
| <b>Q</b>                             | -0.19639   | -0.15338   | -0.1195    | -0.12805   | 0.57802    | 1.0193     |
| <b>S</b>                             | 0.122357   | 0.145059   | 0.0884     | 0.042453   | 0.081466   | 0.520265   |

**Table S9** M8 Predictions

| <b>Predict</b><br><b>Test sample</b> | <b>(U)</b> | <b>(V)</b> |
|--------------------------------------|------------|------------|
| <b>U</b>                             | 1.22045    | -0.22045   |
| <b>V</b>                             | -0.78072   | 1.78072    |

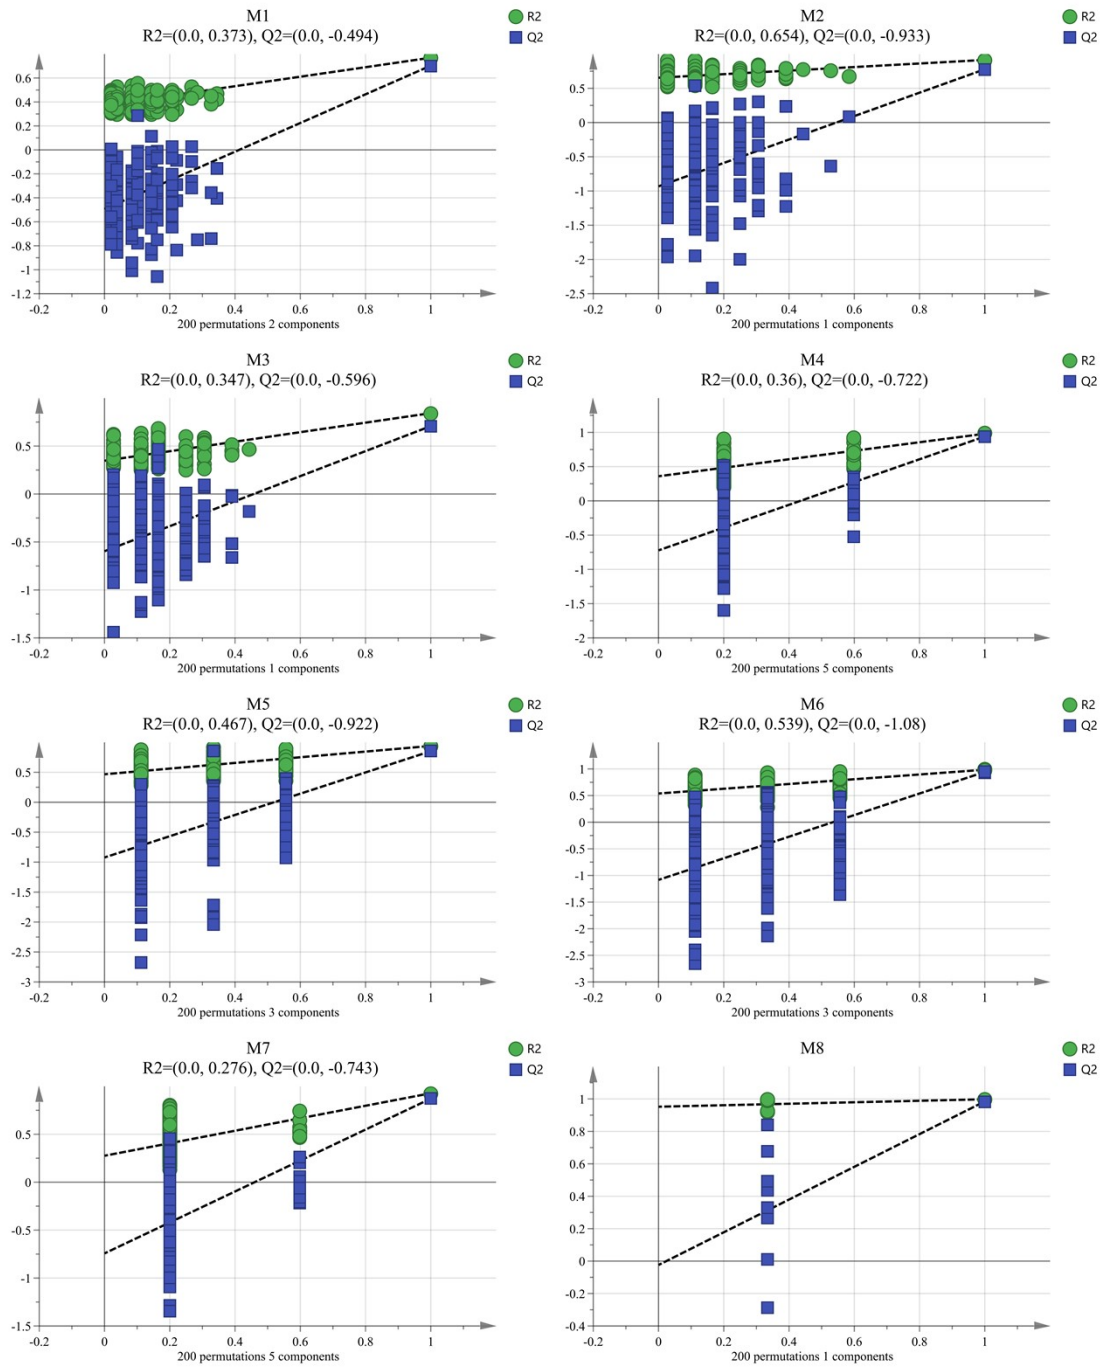

**Fig. S1** Permutation test validation (n=200) for the OPLS-DA hierarchical classification framework. The plot shows the regression of  $R^2$  (green) and  $Q^2$  (blue) against the permutation ratio.

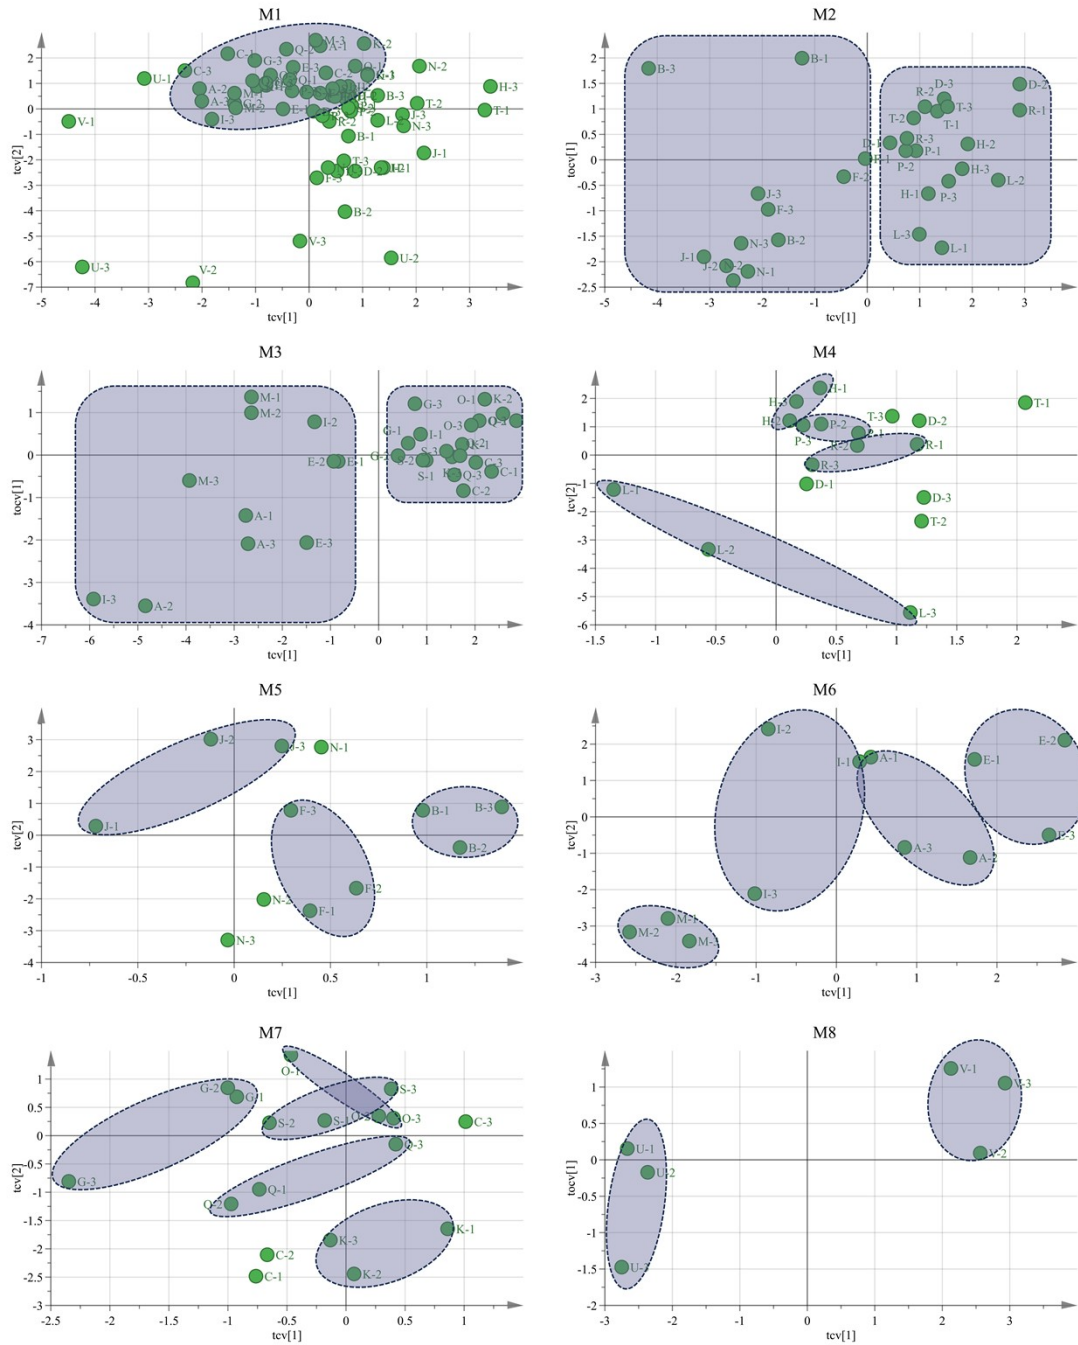

**Fig. S2** Cross validated plots
